# Supplementary material
Source: PubMed Central journal article supplement (PMC9507268)
Supplement: S0950268814003173sup001.pdf [file S0950268814003173sup001.pdf]

Evaluation of the representativeness of a sentinel surveillance site for campylobacteriosis

C.F.BOLWELL<sup>1</sup>, B.J. GILPIN<sup>2</sup>, D.CAMPBELL<sup>3</sup> and N.P.FRENCH<sup>1</sup>

Supplementary Material

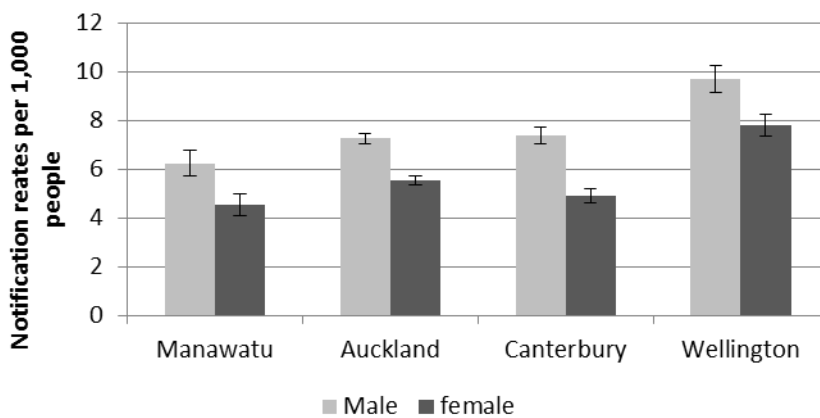

Figure S1: Campylobacteriosis notification rates per 1000 people for males and females stratified by region, for the years 2008-2011.

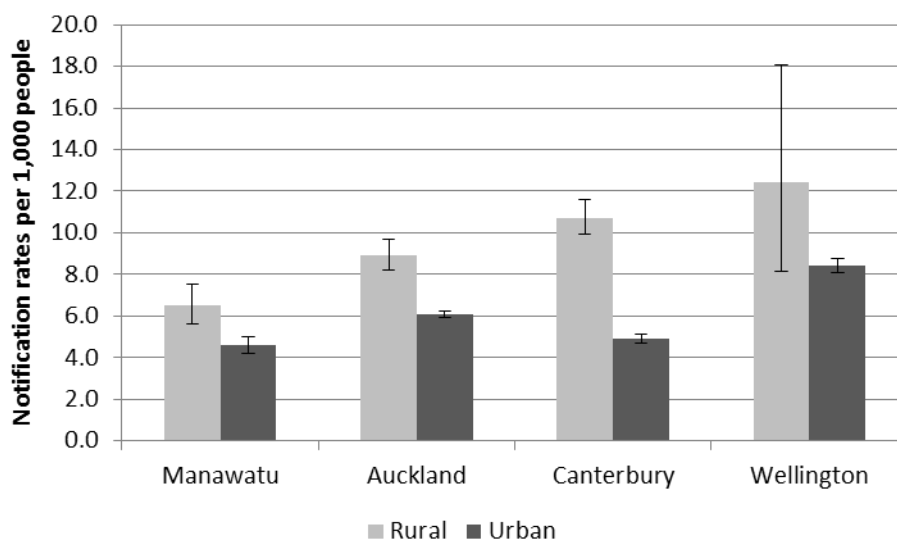

Figure S2: Campylobacteriosis notification rates per 1000 people for urban and rural profiles stratified by region, for the years 2008-2011.

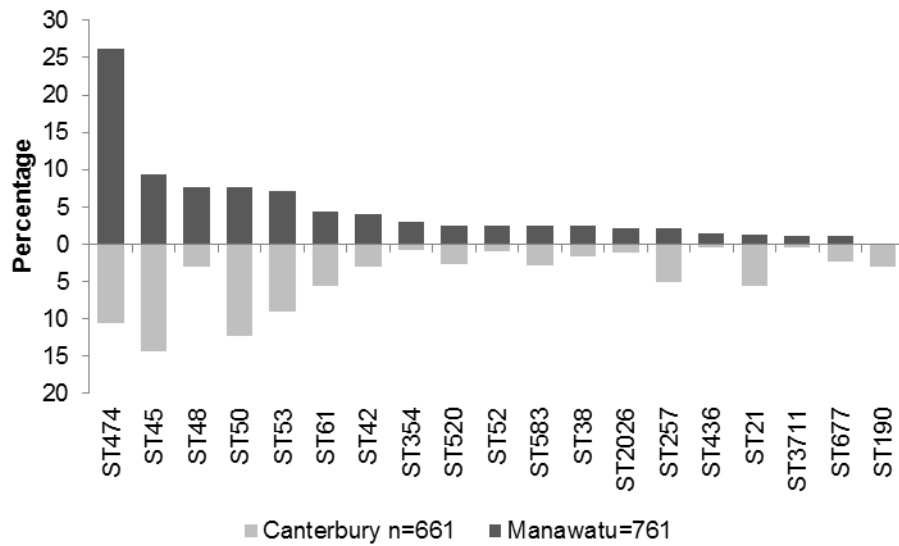

**Figure S3: Sequence type distribution of 1442 *C. jejuni* human isolates in the Canterbury and Manawatu regions from 2000-2012. Only sequence types with  $\geq 1\%$  of isolates out of the total number of isolates (1635) by region are shown.**
